# Supplementary material
Source: ML conference proceedings conference paper supplement (https://openaccess.thecvf.com/content/WACV2023/html/Zhao_PointNeuron_3D_Neuron_WACV_2023_paper.html)
Supplement: Supplementary file 3 [file Zhao_PointNeuron_3D_Neuron_WACV_2023_supplemental.zip]

Archive with 124 entries (109 files):
- 0312-supp/
- __MACOSX/._0312-supp
- 0312-supp/.DS_Store
- __MACOSX/0312-supp/._.DS_Store
- 0312-supp/PointNeuron_supplementary_network_architecture_details.pdf
- __MACOSX/0312-supp/._PointNeuron_supplementary_network_architecture_details.pdf
- 0312-supp/code/
- __MACOSX/0312-supp/._code
- 0312-supp/code/result/
- __MACOSX/0312-supp/code/._result
- 0312-supp/code/.DS_Store
- __MACOSX/0312-supp/code/._.DS_Store
- 0312-supp/code/dataset/
- __MACOSX/0312-supp/code/._dataset
- 0312-supp/code/checkpoints/
- __MACOSX/0312-supp/code/._checkpoints
- 0312-supp/code/utils/
- __MACOSX/0312-supp/code/._utils
- 0312-supp/code/image/
- __MACOSX/0312-supp/code/._image
- 0312-supp/code/README.md
- __MACOSX/0312-supp/code/._README.md
- 0312-supp/code/gae_model/
- __MACOSX/0312-supp/code/._gae_model
- 0312-supp/code/dgcnn_model/
- __MACOSX/0312-supp/code/._dgcnn_model
- 0312-supp/code/demo.py
- __MACOSX/0312-supp/code/._demo.py
- 0312-supp/code/data/
- __MACOSX/0312-supp/code/._data
- 0312-supp/code/result/neuron_input_pts.ply
- __MACOSX/0312-supp/code/result/._neuron_input_pts.ply
- 0312-supp/code/result/neuron_skel.ply
- __MACOSX/0312-supp/code/result/._neuron_skel.ply
- 0312-supp/code/result/neuron_reconst.swc
- __MACOSX/0312-supp/code/result/._neuron_reconst.swc
- 0312-supp/code/dataset/__init__.py
- __MACOSX/0312-supp/code/dataset/.___init__.py
- 0312-supp/code/dataset/__pycache__/
- __MACOSX/0312-supp/code/dataset/.___pycache__
- 0312-supp/code/dataset/skeleton_prediction_demo_dataset.py
- __MACOSX/0312-supp/code/dataset/._skeleton_prediction_demo_dataset.py
- 0312-supp/code/checkpoints/pretrained_connectivity_pred_module.pth
- __MACOSX/0312-supp/code/checkpoints/._pretrained_connectivity_pred_module.pth
- 0312-supp/code/checkpoints/pretrained_skeleton_pred_module.pth
- __MACOSX/0312-supp/code/checkpoints/._pretrained_skeleton_pred_module.pth
- 0312-supp/code/utils/.DS_Store
- __MACOSX/0312-supp/code/utils/._.DS_Store
- 0312-supp/code/utils/__init__.py
- __MACOSX/0312-supp/code/utils/.___init__.py
- 0312-supp/code/utils/__pycache__/
- __MACOSX/0312-supp/code/utils/.___pycache__
- 0312-supp/code/utils/kmeans.py
- __MACOSX/0312-supp/code/utils/._kmeans.py
- 0312-supp/code/utils/det_soma.py
- __MACOSX/0312-supp/code/utils/._det_soma.py
- 0312-supp/code/utils/pc_utils.py
- __MACOSX/0312-supp/code/utils/._pc_utils.py
- 0312-supp/code/image/README/
- __MACOSX/0312-supp/code/image/._README
- 0312-supp/code/gae_model/link_pred_model.py
- __MACOSX/0312-supp/code/gae_model/._link_pred_model.py
- 0312-supp/code/gae_model/GraphConv.py
- __MACOSX/0312-supp/code/gae_model/._GraphConv.py
- 0312-supp/code/gae_model/init_graph.py
- __MACOSX/0312-supp/code/gae_model/._init_graph.py
- 0312-supp/code/gae_model/__init__.py
- __MACOSX/0312-supp/code/gae_model/.___init__.py
- 0312-supp/code/gae_model/__pycache__/
- __MACOSX/0312-supp/code/gae_model/.___pycache__
- 0312-supp/code/gae_model/graph_init_from_app2.txt
- __MACOSX/0312-supp/code/gae_model/._graph_init_from_app2.txt
- 0312-supp/code/gae_model/interp_graph.py
- __MACOSX/0312-supp/code/gae_model/._interp_graph.py
- 0312-supp/code/dgcnn_model/__init__.py
- __MACOSX/0312-supp/code/dgcnn_model/.___init__.py
- 0312-supp/code/dgcnn_model/__pycache__/
- __MACOSX/0312-supp/code/dgcnn_model/.___pycache__
- 0312-supp/code/dgcnn_model/proposal_module.py
- __MACOSX/0312-supp/code/dgcnn_model/._proposal_module.py
- 0312-supp/code/dgcnn_model/dgcnn_loss.py
- __MACOSX/0312-supp/code/dgcnn_model/._dgcnn_loss.py
- 0312-supp/code/dgcnn_model/dgcnn.py
- __MACOSX/0312-supp/code/dgcnn_model/._dgcnn.py
- 0312-supp/code/data/sample.tif
- __MACOSX/0312-supp/code/data/._sample.tif
- 0312-supp/code/dataset/__pycache__/skeleton_prediction_demo_dataset.cpython-37.pyc
- __MACOSX/0312-supp/code/dataset/__pycache__/._skeleton_prediction_demo_dataset.cpython-37.pyc
- 0312-supp/code/dataset/__pycache__/__init__.cpython-37.pyc
- __MACOSX/0312-supp/code/dataset/__pycache__/.___init__.cpython-37.pyc
- 0312-supp/code/utils/__pycache__/kmeans.cpython-37.pyc
- __MACOSX/0312-supp/code/utils/__pycache__/._kmeans.cpython-37.pyc
- 0312-supp/code/utils/__pycache__/det_soma.cpython-37.pyc
- __MACOSX/0312-supp/code/utils/__pycache__/._det_soma.cpython-37.pyc
- 0312-supp/code/utils/__pycache__/pc_utils.cpython-37.pyc
- __MACOSX/0312-supp/code/utils/__pycache__/._pc_utils.cpython-37.pyc
- 0312-supp/code/utils/__pycache__/__init__.cpython-37.pyc
- __MACOSX/0312-supp/code/utils/__pycache__/.___init__.cpython-37.pyc
- 0312-supp/code/image/README/1657892609167.png
- __MACOSX/0312-supp/code/image/README/._1657892609167.png
- 0312-supp/code/image/README/1657892561310.png
- __MACOSX/0312-supp/code/image/README/._1657892561310.png
- 0312-supp/code/image/README/1657885995228.png
- __MACOSX/0312-supp/code/image/README/._1657885995228.png
- 0312-supp/code/image/README/1657885889431.png
- __MACOSX/0312-supp/code/image/README/._1657885889431.png
- 0312-supp/code/gae_model/__pycache__/GraphConv.cpython-37.pyc
- __MACOSX/0312-supp/code/gae_model/__pycache__/._GraphConv.cpython-37.pyc
- 0312-supp/code/gae_model/__pycache__/link_pred_model.cpython-37.pyc
- __MACOSX/0312-supp/code/gae_model/__pycache__/._link_pred_model.cpython-37.pyc
- 0312-supp/code/gae_model/__pycache__/interp_graph.cpython-37.pyc
- __MACOSX/0312-supp/code/gae_model/__pycache__/._interp_graph.cpython-37.pyc
- 0312-supp/code/gae_model/__pycache__/init_graph.cpython-37.pyc
- __MACOSX/0312-supp/code/gae_model/__pycache__/._init_graph.cpython-37.pyc
- 0312-supp/code/gae_model/__pycache__/__init__.cpython-37.pyc
- __MACOSX/0312-supp/code/gae_model/__pycache__/.___init__.cpython-37.pyc
- 0312-supp/code/dgcnn_model/__pycache__/proposal_module.cpython-37.pyc
- __MACOSX/0312-supp/code/dgcnn_model/__pycache__/._proposal_module.cpython-37.pyc
- 0312-supp/code/dgcnn_model/__pycache__/dgcnn.cpython-37.pyc
- __MACOSX/0312-supp/code/dgcnn_model/__pycache__/._dgcnn.cpython-37.pyc
- 0312-supp/code/dgcnn_model/__pycache__/dgcnn_loss.cpython-37.pyc
- __MACOSX/0312-supp/code/dgcnn_model/__pycache__/._dgcnn_loss.cpython-37.pyc
- 0312-supp/code/dgcnn_model/__pycache__/__init__.cpython-37.pyc
- __MACOSX/0312-supp/code/dgcnn_model/__pycache__/.___init__.cpython-37.pyc
