# Supplementary material
Source: ML conference proceedings conference paper supplement (https://openaccess.thecvf.com/content/WACV2023/html/Zhao_PointNeuron_3D_Neuron_WACV_2023_paper.html)
Supplement: Supplementary file 3 [file Zhao_PointNeuron_3D_Neuron_WACV_2023_supplemental.zip › 0312-supp/code/dataset/__init__.py]

from . import skeleton_prediction_demo_dataset
