# Supplementary material
Source: ML conference proceedings conference paper supplement (https://openaccess.thecvf.com/content/WACV2023/html/Zhao_PointNeuron_3D_Neuron_WACV_2023_paper.html)
Supplement: Supplementary file 3 [file Zhao_PointNeuron_3D_Neuron_WACV_2023_supplemental.zip › 0312-supp/code/gae_model/graph_init_from_app2.txt]

1.000 274.000 469.307 154.099 97.641 3.000 -1.000
2.000 274.000 460.758 154.810 102.552 1.000 1.000
3.000 274.000 454.432 159.417 108.490 1.000 2.000
4.000 274.000 448.719 164.899 113.659 1.000 3.000
5.000 274.000 442.496 170.119 118.881 1.000 4.000
6.000 274.000 435.621 174.929 123.913 1.000 5.000
7.000 274.000 428.265 180.091 127.716 1.000 6.000
8.000 274.000 420.265 182.759 132.580 1.000 7.000
9.000 274.000 412.780 183.168 139.080 1.000 8.000
10.000 274.000 411.180 183.556 140.112 1.000 9.000
11.000 274.000 405.062 190.071 144.289 1.000 10.000
12.000 274.000 397.308 194.833 147.591 1.927 11.000
13.000 274.000 388.781 198.843 150.590 1.000 12.000
14.000 274.000 379.650 200.274 152.607 1.000 13.000
15.000 274.000 371.156 195.645 151.798 1.590 14.000
16.000 274.000 362.323 192.940 148.348 1.205 15.000
17.000 274.000 353.029 191.903 145.141 1.000 16.000
18.000 274.000 343.620 191.922 143.132 1.000 17.000
19.000 274.000 334.971 191.180 138.742 1.000 18.000
20.000 274.000 327.518 190.433 132.460 2.000 19.000
21.000 274.000 319.502 190.063 126.563 1.000 20.000
22.000 274.000 310.976 188.021 121.908 1.000 21.000
23.000 274.000 302.281 185.553 117.839 1.676 22.000
24.000 274.000 293.746 182.733 113.815 1.000 23.000
25.000 274.000 284.842 180.491 110.461 1.000 24.000
26.000 274.000 276.087 176.660 108.119 1.000 25.000
27.000 274.000 267.583 172.844 105.132 1.702 26.000
28.000 274.000 258.606 169.721 102.165 1.000 27.000
29.000 274.000 249.631 166.896 98.937 1.000 28.000
30.000 274.000 240.808 163.790 95.571 1.000 29.000
31.000 274.000 231.810 160.780 92.563 1.000 30.000
32.000 274.000 223.355 156.719 89.287 1.000 31.000
33.000 274.000 214.544 152.363 88.230 1.000 32.000
34.000 274.000 205.726 148.009 87.203 1.000 33.000
35.000 274.000 196.726 144.396 89.171 1.000 34.000
36.000 274.000 187.982 140.587 91.827 1.379 35.000
37.000 274.000 181.684 133.682 94.725 1.000 36.000
38.000 274.000 174.610 127.097 96.139 1.881 37.000
39.000 274.000 166.578 123.598 100.576 1.000 38.000
40.000 274.000 158.010 121.496 103.551 1.000 39.000
41.000 274.000 151.449 114.599 100.949 1.000 40.000
42.000 274.000 146.792 106.582 98.188 1.000 41.000
43.000 274.000 141.115 100.156 93.475 1.000 42.000
44.000 274.000 135.641 93.107 89.233 1.724 43.000
45.000 274.000 130.793 85.366 85.664 1.000 44.000
46.000 274.000 126.008 77.748 81.577 1.000 45.000
47.000 274.000 120.040 70.275 79.200 1.000 46.000
48.000 274.000 113.446 63.681 76.009 1.000 47.000
49.000 274.000 107.106 57.409 71.768 1.000 48.000
50.000 274.000 100.562 52.107 66.656 1.000 49.000
51.000 274.000 94.684 46.882 61.030 1.000 50.000
52.000 274.000 87.681 41.842 56.295 1.000 51.000
53.000 274.000 79.897 37.405 52.166 1.000 52.000
54.000 274.000 71.597 33.852 48.181 1.892 53.000
55.000 274.000 63.325 30.921 43.854 1.000 54.000
56.000 274.000 54.780 26.621 41.276 1.000 55.000
57.000 274.000 45.771 24.927 37.760 1.412 56.000
58.000 274.000 36.510 23.940 34.882 2.000 57.000
59.000 274.000 30.334 24.792 27.880 3.000 58.000
60.000 274.000 29.838 25.984 26.126 2.000 59.000
61.000 274.000 29.576 27.608 24.491 2.000 60.000
62.000 274.000 26.047 33.282 20.576 1.887 61.000
63.000 274.000 16.845 35.580 23.035 1.000 62.000
64.000 274.000 10.918 39.908 29.378 1.000 63.000
65.000 274.000 5.495 47.713 30.978 1.000 64.000
66.000 274.000 1.476 53.888 24.647 1.000 65.000
67.000 274.000 0.957 54.184 14.830 1.000 66.000
68.000 274.000 0.957 48.809 6.699 1.000 67.000
69.000 20.000 29.645 27.717 22.641 2.000 61.000
70.000 20.000 33.408 30.033 15.151 1.000 69.000
71.000 20.000 38.935 35.033 11.078 1.000 70.000
72.000 20.000 39.608 43.225 5.489 1.000 71.000
73.000 20.000 44.980 48.809 0.957 1.000 72.000
74.000 21.000 24.461 25.857 19.634 1.000 60.000
75.000 21.000 15.699 26.918 15.521 1.000 74.000
76.000 21.000 16.270 31.542 8.585 1.000 75.000
77.000 21.000 16.270 41.152 6.699 1.000 76.000
78.000 21.000 28.842 19.052 24.589 1.107 59.000
79.000 21.000 31.855 11.730 27.767 1.000 78.000
80.000 21.000 35.572 2.686 28.383 1.000 79.000
81.000 21.000 37.324 0.957 37.324 1.000 80.000
82.000 127.000 412.533 181.286 140.398 1.000 9.000
83.000 127.000 409.627 171.916 140.781 1.000 82.000
84.000 127.000 407.613 162.526 142.913 1.000 83.000
85.000 127.000 403.573 153.927 145.634 1.758 84.000
86.000 127.000 400.956 146.911 152.022 2.000 85.000
87.000 127.000 400.892 146.751 152.212 1.857 86.000
88.000 127.000 398.009 139.232 157.741 1.000 87.000
89.000 127.000 394.158 130.516 160.063 1.356 88.000
90.000 127.000 389.508 123.334 164.415 1.600 89.000
91.000 127.000 385.258 115.851 168.969 2.000 90.000
92.000 127.000 384.189 113.074 170.801 1.484 91.000
93.000 127.000 377.357 106.246 172.552 2.000 92.000
94.000 127.000 370.697 98.904 173.554 1.000 93.000
95.000 127.000 367.172 95.413 175.817 2.000 94.000
96.000 127.000 365.816 94.510 181.278 2.000 95.000
97.000 127.000 362.335 89.635 188.725 2.000 96.000
98.000 127.000 360.913 88.308 191.080 2.000 97.000
99.000 127.000 356.649 84.360 199.042 1.520 98.000
100.000 127.000 352.377 79.855 206.616 2.000 99.000
101.000 127.000 351.313 79.131 207.104 1.000 100.000
102.000 127.000 345.583 75.651 202.950 1.000 101.000
103.000 127.000 340.947 71.961 206.702 1.000 102.000
104.000 127.000 338.254 67.841 215.267 1.144 103.000
105.000 127.000 332.594 63.976 222.044 1.000 104.000
106.000 127.000 329.869 60.001 230.531 1.094 105.000
107.000 127.000 324.735 56.203 237.664 1.000 106.000
108.000 127.000 316.451 51.515 240.234 1.000 107.000
109.000 127.000 316.582 44.925 240.768 1.000 108.000
110.000 127.000 322.804 43.048 233.453 1.000 109.000
111.000 127.000 328.262 35.410 230.645 1.000 110.000
112.000 36.000 342.010 74.406 196.592 1.203 102.000
113.000 36.000 333.150 70.502 197.877 1.451 112.000
114.000 36.000 326.204 64.165 201.039 1.000 113.000
115.000 36.000 318.847 58.635 204.578 1.000 114.000
116.000 36.000 310.764 53.845 207.258 1.000 115.000
117.000 36.000 308.785 52.610 199.716 1.000 116.000
118.000 36.000 305.423 51.440 190.535 1.000 117.000
119.000 36.000 303.379 50.723 180.879 1.000 118.000
120.000 26.000 350.875 77.366 210.271 1.329 101.000
121.000 26.000 353.001 75.432 218.416 1.221 120.000
122.000 26.000 360.839 74.779 220.456 1.000 121.000
123.000 26.000 362.759 68.301 227.588 1.000 122.000
124.000 26.000 366.257 60.876 233.158 1.000 123.000
125.000 26.000 368.457 54.551 240.215 1.000 124.000
126.000 22.000 356.192 80.000 209.752 1.000 100.000
127.000 22.000 363.993 84.022 213.309 1.000 126.000
128.000 22.000 372.303 87.894 216.953 1.000 127.000
129.000 22.000 381.595 90.444 216.356 1.000 128.000
130.000 22.000 390.226 86.781 217.701 1.000 129.000
131.000 22.000 397.168 83.262 222.988 1.000 130.000
132.000 22.000 364.052 89.162 190.016 1.251 97.000
133.000 22.000 369.424 89.144 197.300 1.000 132.000
134.000 22.000 372.044 95.629 203.109 1.000 133.000
135.000 22.000 370.182 103.595 208.590 1.000 134.000
136.000 22.000 368.457 111.973 213.418 1.000 135.000
137.000 31.000 364.652 94.752 173.246 1.009 95.000
138.000 31.000 357.141 92.053 167.861 2.000 137.000
139.000 31.000 354.648 90.231 168.056 1.484 138.000
140.000 31.000 349.801 83.867 173.641 1.000 139.000
141.000 31.000 348.019 80.803 182.357 1.000 140.000
142.000 31.000 352.550 77.180 190.391 1.000 141.000
143.000 31.000 353.746 68.789 194.277 1.000 142.000
144.000 31.000 358.887 60.293 194.277 1.000 143.000
145.000 20.000 357.129 93.216 162.997 1.000 138.000
146.000 20.000 359.213 96.532 154.128 1.000 145.000
147.000 20.000 357.065 93.479 145.694 1.000 146.000
148.000 20.000 355.753 88.268 137.456 1.000 147.000
149.000 20.000 351.230 81.348 133.027 1.000 148.000
150.000 127.000 370.594 98.800 172.847 1.315 94.000
151.000 21.000 368.443 100.346 163.563 1.000 150.000
152.000 21.000 369.603 95.032 159.364 1.000 151.000
153.000 21.000 371.973 85.582 157.910 1.000 152.000
154.000 21.000 372.285 75.606 157.910 1.000 153.000
155.000 30.000 385.490 115.824 170.243 2.000 91.000
156.000 30.000 387.409 110.406 177.984 1.000 155.000
157.000 30.000 384.370 107.133 186.603 2.000 156.000
158.000 30.000 380.220 101.040 187.838 1.000 157.000
159.000 30.000 387.557 99.677 187.829 1.000 158.000
160.000 30.000 395.897 94.421 188.608 1.000 159.000
161.000 30.000 404.824 90.918 190.449 1.000 160.000
162.000 35.000 393.731 142.067 151.969 1.000 86.000
163.000 35.000 389.290 133.323 151.102 1.000 162.000
164.000 35.000 385.211 124.484 151.664 1.000 163.000
165.000 35.000 379.369 117.147 150.196 1.000 164.000
166.000 35.000 374.056 115.926 142.332 1.000 165.000
167.000 35.000 370.678 117.790 133.216 1.000 166.000
168.000 35.000 372.049 119.449 123.657 1.000 167.000
169.000 35.000 373.361 115.844 114.727 1.000 168.000
170.000 35.000 378.543 111.304 108.298 1.000 169.000
171.000 35.000 385.684 104.316 108.145 1.000 170.000
