# Supplementary material
Source: ML conference proceedings conference paper supplement (https://openaccess.thecvf.com/content/WACV2023/html/Zhao_PointNeuron_3D_Neuron_WACV_2023_paper.html)
Supplement: Supplementary file 3 [file Zhao_PointNeuron_3D_Neuron_WACV_2023_supplemental.zip › 0312-supp/code/result/neuron_reconst.swc]

1 0 469.124 154.997 97.827 1.012 -1
2 0 460.664 153.932 102.146 1.000 1
3 0 453.868 158.177 108.520 1.037 2
4 0 447.805 164.610 113.571 0.987 3
5 0 442.290 169.792 117.924 1.008 4
6 0 434.779 174.943 122.921 0.997 5
7 0 427.645 178.935 126.837 1.031 6
8 0 419.012 182.176 132.902 1.010 7
9 0 412.052 181.789 137.983 0.994 8
10 0 409.938 183.080 140.469 1.002 9
11 0 404.848 188.911 143.730 0.994 10
12 0 396.769 194.823 146.869 1.006 11
13 0 388.106 197.958 149.910 1.007 12
14 0 379.079 199.431 151.985 1.042 13
15 0 371.966 195.939 151.853 1.004 14
16 0 361.949 192.528 147.955 1.049 15
17 0 353.405 191.191 145.824 1.088 16
18 0 344.009 190.915 141.710 1.008 17
19 0 336.014 190.807 138.076 1.006 18
20 0 327.205 189.968 131.969 1.004 19
21 0 319.071 189.318 125.864 1.014 20
22 0 312.066 187.476 121.223 1.003 21
23 0 302.342 184.973 116.390 1.002 22
24 0 293.618 182.484 113.427 1.057 23
25 0 284.641 179.553 109.936 1.039 24
26 0 276.049 175.966 107.835 1.017 25
27 0 267.358 172.252 105.071 1.003 26
28 0 258.888 169.420 101.837 1.041 27
29 0 249.901 166.157 98.525 1.006 28
30 0 241.004 162.864 94.857 1.012 29
31 0 232.066 159.916 90.920 1.010 30
32 0 223.357 155.889 88.566 1.002 31
33 0 214.530 152.096 88.148 1.014 32
34 0 206.008 147.683 87.147 1.015 33
35 0 196.322 144.017 89.251 1.042 34
36 0 187.700 140.062 90.926 1.011 35
37 0 181.123 133.033 93.780 1.009 36
38 0 173.744 125.799 95.314 1.012 37
39 0 166.074 122.858 100.035 1.010 38
40 0 158.124 120.961 103.767 1.012 39
41 0 152.032 114.823 100.914 1.014 40
42 0 147.021 106.853 97.976 1.009 41
43 0 140.970 99.970 93.718 1.010 42
44 0 135.933 93.007 89.203 1.015 43
45 0 130.707 85.279 85.546 1.000 44
46 0 125.919 77.688 81.677 0.996 45
47 0 120.009 70.659 78.865 1.000 46
48 0 113.563 64.085 75.597 1.007 47
49 0 107.028 57.420 70.825 1.002 48
50 0 100.991 51.840 66.775 1.017 49
51 0 94.672 46.918 60.981 0.996 50
52 0 88.018 41.966 56.701 1.007 51
53 0 80.326 36.990 51.650 1.009 52
54 0 72.581 34.039 48.038 1.031 53
55 0 63.241 30.480 43.461 1.032 54
56 0 54.914 25.268 40.812 0.990 55
57 0 45.574 23.938 38.119 1.054 56
58 0 36.031 23.813 35.901 1.000 57
59 0 30.294 24.411 27.697 1.008 58
60 0 27.952 19.984 24.759 1.024 59
61 0 26.635 17.306 25.906 1.034 60
62 0 26.404 17.034 24.882 1.016 61
63 0 38.593 22.113 35.348 1.013 62
64 0 29.427 25.127 26.203 1.005 59
65 0 29.836 27.655 24.971 1.009 64
66 0 25.956 33.184 20.043 0.989 65
67 0 15.087 35.538 22.439 1.003 66
68 0 10.110 38.765 27.988 1.000 67
69 0 4.114 46.024 28.833 1.005 68
70 0 1.265 51.402 25.106 1.005 69
71 0 2.614 50.786 24.216 1.028 70
72 0 1.459 50.509 24.316 1.042 71
73 0 29.258 27.426 22.090 1.023 65
74 0 32.853 29.137 15.301 1.040 73
75 0 35.958 29.811 14.821 1.002 74
76 0 35.620 29.873 14.717 1.001 75
77 0 33.973 29.601 13.831 1.010 76
78 0 24.107 24.514 19.557 1.044 64
79 0 14.619 26.266 14.757 1.035 78
80 0 14.964 26.866 11.178 1.028 79
81 0 21.594 33.005 17.763 1.027 80
82 0 411.139 181.316 139.095 1.036 9
83 0 409.448 172.930 139.722 1.002 82
84 0 407.104 162.783 141.937 1.016 83
85 0 403.533 154.669 144.687 1.024 84
86 0 400.114 146.980 150.853 1.010 85
87 0 394.142 142.182 152.010 1.032 86
88 0 388.989 133.206 151.191 1.012 87
89 0 385.476 124.010 151.259 1.001 88
90 0 379.076 116.979 150.257 1.022 89
91 0 373.545 114.982 142.182 0.994 90
92 0 371.177 117.951 132.973 1.058 91
93 0 371.961 118.852 125.007 0.993 92
94 0 371.896 118.845 125.236 0.993 93
95 0 371.137 118.369 125.994 1.013 94
96 0 371.276 118.205 126.182 1.007 95
97 0 400.050 147.028 150.836 1.024 86
98 0 398.170 139.084 156.332 1.058 97
99 0 393.798 130.748 159.762 1.010 98
100 0 389.107 123.121 163.328 1.021 99
101 0 385.125 116.590 168.485 0.998 100
102 0 384.851 114.850 169.938 0.999 101
103 0 386.449 109.915 177.805 1.017 102
104 0 383.877 106.904 185.734 1.018 103
105 0 378.791 101.130 186.887 1.008 104
106 0 381.598 100.031 183.825 0.999 105
107 0 381.405 100.044 183.680 1.021 106
108 0 385.023 103.789 197.149 0.968 107
109 0 384.333 113.331 171.189 1.036 101
110 0 377.068 106.202 172.432 1.011 109
111 0 371.423 98.893 172.325 1.025 110
112 0 366.795 95.011 175.844 1.035 111
113 0 364.947 93.998 173.835 0.999 112
114 0 357.097 91.954 167.037 1.001 113
115 0 355.188 89.723 168.184 1.016 114
116 0 349.830 83.713 173.637 1.015 115
117 0 347.626 79.127 182.313 0.995 116
118 0 352.893 76.974 190.323 1.036 117
119 0 352.859 77.687 189.096 1.008 118
120 0 348.302 70.185 206.012 1.015 119
121 0 356.232 92.016 162.342 1.037 114
122 0 358.994 95.531 154.181 0.999 121
123 0 360.167 95.855 148.094 1.097 122
124 0 360.046 95.107 150.017 1.016 123
125 0 357.719 94.308 151.421 1.015 124
126 0 365.725 94.367 181.994 1.092 112
127 0 362.654 88.945 188.987 1.009 126
128 0 361.030 88.248 191.214 0.989 127
129 0 356.094 83.876 198.087 1.011 128
130 0 352.614 78.907 206.768 0.994 129
131 0 352.294 78.524 207.275 1.038 130
132 0 346.739 75.646 202.880 1.038 131
133 0 340.010 70.889 205.454 1.013 132
134 0 338.026 68.177 215.048 1.000 133
135 0 331.917 62.629 221.219 1.032 134
136 0 329.405 59.196 229.795 1.003 135
137 0 324.973 55.566 235.799 1.006 136
138 0 316.946 50.967 238.794 1.016 137
139 0 313.256 44.375 240.393 1.013 138
140 0 317.906 51.704 237.151 1.058 139
141 0 313.257 44.202 240.252 1.023 140
142 0 342.063 73.754 196.943 1.009 132
143 0 333.735 69.909 196.891 1.011 142
144 0 326.084 64.011 200.000 1.001 143
145 0 319.402 58.984 203.944 1.018 144
146 0 310.727 53.239 206.962 1.011 145
147 0 308.029 51.967 205.284 1.076 146
148 0 309.404 52.112 205.882 1.075 147
149 0 319.095 56.133 200.304 1.018 148
150 0 351.256 77.089 211.164 1.021 131
151 0 353.077 73.784 218.067 1.008 150
152 0 359.584 74.906 217.976 1.007 151
153 0 359.186 74.212 217.799 1.019 152
154 0 349.402 71.066 224.986 1.006 153
155 0 347.899 70.618 225.891 1.021 154
156 0 356.133 79.800 209.364 1.015 130
157 0 363.938 83.965 213.158 1.013 156
158 0 363.966 83.989 213.229 1.011 157
159 0 371.713 88.459 215.915 1.004 157
160 0 377.585 88.935 215.968 1.010 159
161 0 377.256 88.829 215.600 1.007 160
162 0 376.930 88.960 215.369 1.030 161
163 0 363.745 88.240 190.452 1.009 127
164 0 369.931 88.656 197.862 1.007 163
165 0 372.013 93.562 199.888 1.010 164
166 0 371.152 93.862 199.318 1.012 165
167 0 380.766 101.575 197.705 1.063 166
168 0 371.605 98.511 172.263 1.023 111
169 0 368.049 99.848 163.330 1.048 168
170 0 365.971 97.951 157.921 1.022 169
171 0 365.973 97.607 156.542 0.991 170
172 0 357.734 92.939 156.433 1.036 171
